# Supplementary material
Source: HighWire-hosted journal article supplement (https://bmjopen.bmj.com/content/12/2/e055118)
Supplement: inline-supplementary-material-1 [file inline-supplementary-material-1.pdf]

**Supplemental table 1** Associations between age at menarche and prevalence of chronic LBP in HUNT2 in cross-sectional analysis, in broad intervals of age

|                                     | Age 20-39 years     | Age 40-49 years     | Age 50-69 years     |
|-------------------------------------|---------------------|---------------------|---------------------|
|                                     | RR (95% CI)*        | RR (95% CI)*        | RR (95% CI)*        |
| Number of women included            | 10 298              | 6508                | 8145                |
| Age at menarche (year)              |                     |                     |                     |
| ≤ 11                                | 1.54 (1.34 to 1.77) | 1.36 (1.19 to 1.56) | 1.18 (1.05 to 1.33) |
| 12                                  | 1.16 (1.03 to 1.32) | 1.14 (1.02 to 1.29) | 1.12 (1.02 to 1.23) |
| 13                                  | 1.09 (0.96 to 1.22) | 1.11 (0.99 to 1.24) | 1.06 (0.97 to 1.15) |
| 14                                  | 1.00 (reference)    | 1.00 (reference)    | 1.00 (reference)    |
| 15                                  | 1.09 (0.93 to 1.29) | 1.12 (0.98 to 1.28) | 0.98 (0.89 to 1.08) |
| 16                                  | 1.36 (1.07 to 1.74) | 1.02 (0.80 to 1.30) | 0.93 (0.78 to 1.09) |
| ≥ 17                                | 1.48 (0.97 to 2.26) | 1.75 (1.22 to 2.51) | 1.11 (0.85 to 1.45) |
| P for categorical effect            | < 0.001             | < 0.001             | 0.013               |
| P for linear trend                  | < 0.001             | 0.009               | < 0.001             |
| P for quadratic effect <sup>†</sup> | < 0.001             | 0.001               | 0.21                |

\*Adjustment for age, BMI, physical activity, education, smoking, nulliparity and age at first delivery.

<sup>†</sup>In model also including linear effect.

BMI, body mass index; HUNT, Trøndelag Health Study; LBP, low back pain; RR, relative risk.

**Supplemental table 2** Associations between age at menarche and risk of chronic LBP in prospective analysis in HUNT3, in broad intervals of age in HUNT2

|                          | Age 20-39 years     | Age 40-49 years     | Age 50-69 years     |
|--------------------------|---------------------|---------------------|---------------------|
|                          | RR (95% CI)*        | RR (95% CI)*        | RR (95% CI)*        |
| Number of women included | 4254                | 3144                | 3456                |
| Age at menarche (year)   |                     |                     |                     |
| ≤ 11                     | 1.34 (1.06 to 1.68) | 1.33 (1.05 to 1.68) | 1.30 (1.00 to 1.69) |
| 12                       | 1.15 (0.95 to 1.38) | 0.99 (0.80 to 1.21) | 1.24 (1.02 to 1.51) |
| 13                       | 1.01 (0.85 to 1.21) | 1.01 (0.84 to 1.22) | 1.03 (0.86 to 1.24) |
| 14                       | 1.00 (reference)    | 1.00 (reference)    | 1.00 (reference)    |
| 15                       | 1.20 (0.96 to 1.51) | 0.96 (0.76 to 1.21) | 0.95 (0.77 to 1.18) |
| 16                       | 1.13 (0.75 to 1.71) | 0.79 (0.51 to 1.21) | 1.08 (0.78 to 1.49) |
| ≥ 17                     | 1.60 (0.94 to 2.75) | 1.16 (0.53 to 2.53) | 1.54 (0.97 to 2.46) |
| P for categorical effect | 0.10                | 0.19                | 0.08                |
| P for linear trend       | 0.46                | 0.048               | 0.06                |
| P for quadratic effect†  | 0.002               | 0.32                | 0.019               |

\*Adjustment for age, BMI, physical activity, education, smoking, nulliparity and age at first delivery.

†In model also including linear effect.

BMI, body mass index; HUNT, Trøndelag Health Study; LBP, low back pain; RR, relative risk.

**Supplemental table 3** Associations between age at menarche and prevalence of chronic LBP in HUNT2 in cross-sectional analysis, by duration of education

|                                     | Education<br>≤ 9 years | Education<br>10-12 years | Education<br>≥ 13 years |
|-------------------------------------|------------------------|--------------------------|-------------------------|
|                                     | RR (95% CI)*           | RR (95% CI)*             | RR (95% CI)*            |
| Number of women included            | 7597                   | 11 361                   | 5993                    |
| Age at menarche (year)              |                        |                          |                         |
| ≤ 11                                | 1.16 (1.03 to 1.31)    | 1.56 (1.40 to 1.73)      | 1.22 (1.02 to 1.45)     |
| 12                                  | 1.13 (1.03 to 1.24)    | 1.16 (1.05 to 1.28)      | 1.10 (0.94 to 1.29)     |
| 13                                  | 1.06 (0.97 to 1.16)    | 1.10 (1.01 to 1.21)      | 1.04 (0.90 to 1.21)     |
| 14                                  | 1.00 (reference)       | 1.00 (reference)         | 1.00 (reference)        |
| 15                                  | 0.99 (0.89 to 1.10)    | 1.12 (1.00 to 1.26)      | 1.01 (0.84 to 1.22)     |
| 16                                  | 0.95 (0.80 to 1.13)    | 1.00 (0.80 to 1.24)      | 1.32 (1.01 to 1.73)     |
| ≥ 17                                | 1.42 (1.10 to 1.84)    | 1.30 (0.95 to 1.77)      | 0.99 (0.56 to 1.75)     |
| P for categorical effect            | 0.008                  | < 0.001                  | 0.21                    |
| P for linear trend                  | 0.006                  | < 0.001                  | 0.19                    |
| P for quadratic effect <sup>†</sup> | 0.06                   | < 0.001                  | 0.048                   |

\*Adjustment for age, BMI, physical activity, education, smoking, nulliparity and age at first delivery.

<sup>†</sup>In model also including linear effect.

BMI, body mass index; HUNT, Trøndelag Health Study; LBP, low back pain; RR, relative risk.

**Supplemental table 4** Associations between age at menarche and risk of chronic LBP in prospective analysis in HUNT3, by duration of education recorded in HUNT2

|                                     | Education<br>≤ 9 years | Education<br>10-12 years | Education<br>≥ 13 years |
|-------------------------------------|------------------------|--------------------------|-------------------------|
|                                     | RR (95% CI)*           | RR (95% CI)*             | RR (95% CI)*            |
| Number of women included            | 2957                   | 4997                     | 2900                    |
| Age at menarche (year)              |                        |                          |                         |
| ≤ 11                                | 1.31 (0.98 to 1.74)    | 1.28 (1.05 to 1.56)      | 1.36 (1.04 to 1.79)     |
| 12                                  | 1.08 (0.88 to 1.33)    | 1.15 (0.98 to 1.34)      | 1.05 (0.81 to 1.35)     |
| 13                                  | 1.10 (0.91 to 1.32)    | 1.01 (0.87 to 1.17)      | 0.92 (0.72 to 1.16)     |
| 14                                  | 1.00 (reference)       | 1.00 (reference)         | 1.00 (reference)        |
| 15                                  | 1.13 (0.91 to 1.39)    | 1.05 (0.86 to 1.27)      | 0.77 (0.56 to 1.06)     |
| 16                                  | 0.95 (0.65 to 1.37)    | 1.14 (0.83 to 1.57)      | 0.87 (0.50 to 1.50)     |
| ≥ 17                                | 1.75 (1.07 to 2.85)    | 0.95 (0.50 to 1.79)      | 1.87 (1.06 to 3.29)     |
| P for categorical effect            | 0.29                   | 0.21                     | 0.012                   |
| P for linear trend                  | 0.61                   | 0.06                     | 0.031                   |
| P for quadratic effect <sup>†</sup> | 0.08                   | 0.06                     | 0.015                   |

\*Adjustment for age, BMI, physical activity, education, smoking, nulliparity and age at first delivery.

<sup>†</sup>In model also including linear effect.

BMI, body mass index; HUNT, Trøndelag Health Study; LBP, low back pain; RR, relative risk.

**Supplemental table 5** Associations between age at menarche and prevalence of chronic LBP in cross-sectional analysis in HUNT2, with and without adjustment for HADS

|                                     | With standard<br>adjustment* | With standard<br>adjustment* among<br>individuals with<br>known HADS score | With standard<br>adjustment*and<br>adjustment for<br>HADS score |
|-------------------------------------|------------------------------|----------------------------------------------------------------------------|-----------------------------------------------------------------|
|                                     | RR (95% CI)                  | RR (95% CI)                                                                | RR (95% CI)                                                     |
| Number of women<br>included         | 24 951                       | 21 773                                                                     | 21 773                                                          |
| Age at menarche (year)              |                              |                                                                            |                                                                 |
| ≤ 11                                | 1.33 (1.24 to 1.43)          | 1.31 (1.21 to 1.42)                                                        | 1.27 (1.18 to 1.37)                                             |
| 12                                  | 1.13 (1.06 to 1.21)          | 1.13 (1.05 to 1.21)                                                        | 1.12 (1.05 to 1.19)                                             |
| 13                                  | 1.07 (0.91 to 1.14)          | 1.07 (1.00 to 1.14)                                                        | 1.07 (1.00 to 1.14)                                             |
| 14                                  | 1.00 (reference)             | 1.00 (reference)                                                           | 1.00 (reference)                                                |
| 15                                  | 1.04 (0.97 to 1.12)          | 1.05 (0.97 to 1.13)                                                        | 1.02 (0.95 to 1.10)                                             |
| 16                                  | 1.02 (0.91 to 1.15)          | 1.07 (0.94 to 1.21)                                                        | 1.05 (0.92 to 1.19)                                             |
| ≥ 17                                | 1.31 (1.08 to 1.59)          | 1.34 (1.08 to 1.65)                                                        | 1.28 (1.04 to 1.57)                                             |
| P for categorical effect            | < 0.001                      | < 0.001                                                                    | < 0.001                                                         |
| P for linear trend                  | < 0.001                      | < 0.001                                                                    | < 0.001                                                         |
| P for quadratic effect <sup>†</sup> | < 0.001                      | < 0.001                                                                    | < 0.001                                                         |

\*Adjustment for age, BMI, physical activity, education, smoking, nulliparity and age at first delivery.

<sup>†</sup>In model also including linear effect.

BMI, body mass index; HADS, Hospital Anxiety and Depression Scale; HUNT, Trøndelag Health Study; LBP, low back pain; RR, relative risk.

**Supplemental table 6** Associations between age at menarche and risk of chronic LBP in prospective analysis in HUNT3, with and without adjustment for HADS

|                                     | With standard<br>adjustment* | With standard<br>adjustment* among<br>individuals with<br>known HADS score | With standard<br>adjustment* and<br>adjustment for<br>HADS score |
|-------------------------------------|------------------------------|----------------------------------------------------------------------------|------------------------------------------------------------------|
|                                     | RR (95% CI)                  | RR (95% CI)                                                                | RR (95% CI)                                                      |
| Number of women<br>included         | 10 854                       | 9666                                                                       | 9666                                                             |
| Age at menarche (year)              |                              |                                                                            |                                                                  |
| ≤ 11                                | 1.32 (1.15 to 1.52)          | 1.37 (1.18 to 1.59)                                                        | 1.36 (1.17 to 1.57)                                              |
| 12                                  | 1.12 (1.00 to 1.25)          | 1.16 (1.03 to 1.31)                                                        | 1.15 (1.02 to 1.30)                                              |
| 13                                  | 1.01 (0.91 to 1.13)          | 1.04 (0.92 to 1.16)                                                        | 1.04 (0.93 to 1.16)                                              |
| 14                                  | 1.00 (reference)             | 1.00 (reference)                                                           | 1.00 (reference)                                                 |
| 15                                  | 1.02 (0.90 to 1.16)          | 1.05 (0.92 to 1.21)                                                        | 1.04 (0.91 to 1.20)                                              |
| 16                                  | 1.01 (0.81 to 1.25)          | 1.07 (0.85 to 1.36)                                                        | 1.07 (0.84 to 1.35)                                              |
| ≥ 17                                | 1.43 (1.04 to 1.98)          | 1.31 (0.89 to 1.92)                                                        | 1.25 (0.85 to 1.83)                                              |
| P for categorical effect            | 0.002                        | 0.002                                                                      | 0.003                                                            |
| P for linear trend                  | 0.008                        | 0.004                                                                      | 0.003                                                            |
| P for quadratic effect <sup>†</sup> | < 0.001                      | 0.001                                                                      | 0.001                                                            |

\*Adjustment for age, BMI, physical activity, education, smoking, nulliparity and age at first delivery.

<sup>†</sup>In model also including linear effect.

BMI, body mass index; HADS, Hospital Anxiety and Depression Scale; HUNT, Trøndelag Health Study; LBP, low back pain; RR, relative risk.
